# Supplementary material for: Improved biomass production by humic analog anthraquinone-2-sulfonate from kitchen waste in a two-phase system
Source: Royal Society of Chemistry journal article supplement (doi:10.1039/c5ra18240a), 2016-01-01
Supplement: c5ra18240a1.pdf [file c5ra18240a1.pdf]

## Supplementary Information

### Improved biomass production by humic analog anthraquinone-2-sulfonate from kitchen waste in a two-phase system

Xingzu Wang<sup>a</sup>, Guihua Xu<sup>a</sup>, Chunli Wan<sup>\*b</sup>, Yiwei Ren<sup>\*a,b</sup>, Enling Tian<sup>a</sup>  
<sup>a</sup> *Key Laboratory of Reservoir Aquatic Environment, Chongqing Institute of Green and Intelligent Technology, Chinese Academy of Sciences, No. 266 Fangzheng Avenue, Shuitu Hi-tech Industrial Park, Shuitu Town, Beibei District, Chongqing, 400714, China*  
<sup>b</sup> *Department of Environmental Science and Engineering, Fudan University, Shanghai 200433, China*

\* Corresponding Author: Department of Environmental Science and Engineering, Fudan University, Shanghai, 200433, China; Tel: +86-21-65642018; Fax: +86-21-65643597; Email: hitwan@163.com (Chunli Wan)

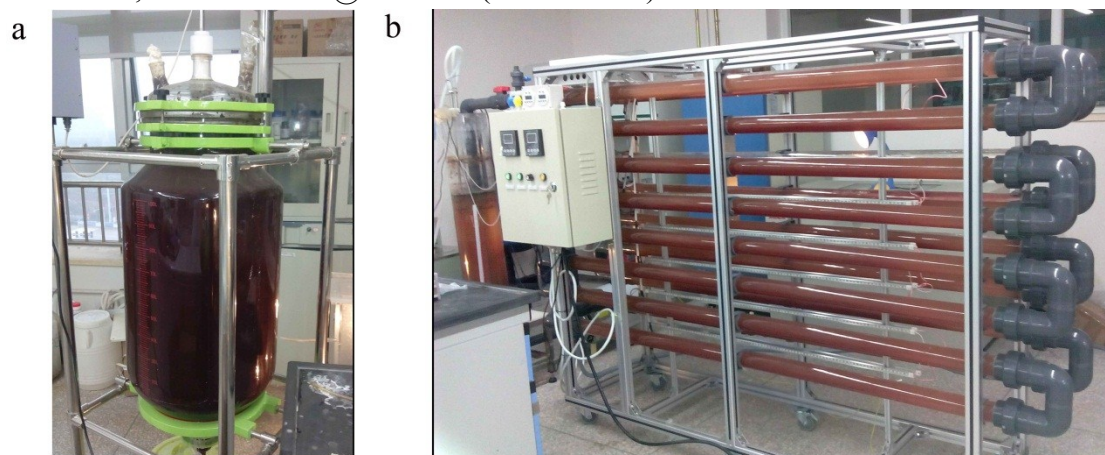

**Fig. S1.** Photograph of the CSTR (a) and TPBR (b).
